# Supplementary material
Source: Springer Nature journal article supplement (https://www.springermedizin.de/resource/supplementary/12986_2009_191_MOESM8_ESM.pdf/25655558)
Supplement: MOESM8 [file 25655558]

ADAS-Cog Mean Change from Baseline

-6.0  
-5.0  
-4.0  
-3.0  
-2.0  
-1.0  
0.0  
1.0  
2.0  
3.0  
4.0

Clinical Improvement ↑

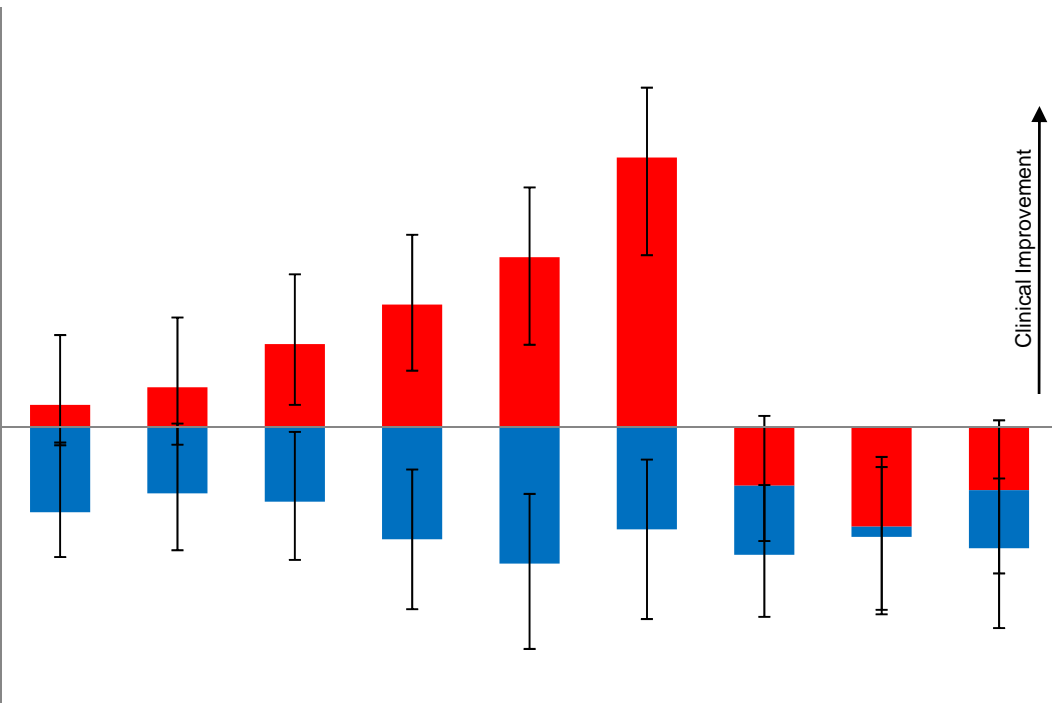

|           | ITT w/LOCF | Per Protocol | Dosage Compliant | E4(-) ITT w/LOCF | E4(-) Per Protocol | E4(-) Dosage Compliant | E4(+) ITT w/LOCF | E4(+) Per Protocol | E4(+) Dosage Compliant |
|-----------|------------|--------------|------------------|------------------|--------------------|------------------------|------------------|--------------------|------------------------|
| ■ Placebo | 1.227      | 0.956        | 1.076            | 1.614            | 1.963              | 1.472                  | 0.989            | 0.145              | 0.833                  |
| ■ AC-1202 | -0.312     | -0.563       | -1.182           | -1.747           | -2.426             | -3.854                 | 0.846            | 1.433              | 0.909                  |
